# Supplementary material for: Cytochrome P450 and P-gp Mediated Herb-Drug Interactions and Molecular Docking Studies of Garcinol
Source: MDPI journal article supplement (doi:10.3390/membranes11120992), 2021-12-19
Supplement: s1 [file s1]

# Cytochrome P450 and P-gp Mediated Herb-Drug Interactions and Molecular Docking Studies of Garcinol

Lavanya Bolla <sup>1</sup>, Pratima Srivastava <sup>1</sup>, Velayutham Ravichandiran <sup>2,\*</sup> and Satheesh Kumar Nanjappan <sup>2,\*</sup>

<sup>1</sup> Aragen Life Sciences Pvt. Ltd. (Formerly known as GVK Biosciences Pvt. Ltd.), IDA Nacharam, Hyderabad 500076, India; lavanyabolla225@gmail.com (L.B.); pratima.srivastava@gvkbio.com (P.S.)

<sup>2</sup> Department of Natural Products, National Institute of Pharmaceutical Education and Research (NIPER), Kolkata, Chunilal Bhawan 168, Maniktala Main Road, Kolkata 700054, India

\* Correspondence: director@niperkolkata.edu.in (V.R.); satheesh.niperk@gmail.com (S.K.N.)

**Table S1.** Inhibition parameters of herbal slimming agents towards eight CYPs in rat liver microsomes.

| CYP Isoform | Substrates       | Inhibitors         | IC <sub>50</sub> (μM/μg/mL)                      |                                              |                                       |                                            |                   |
|-------------|------------------|--------------------|--------------------------------------------------|----------------------------------------------|---------------------------------------|--------------------------------------------|-------------------|
|             |                  |                    | <i>Garcinia cambo-</i><br><i>gia</i> Formulation | <i>Garcinia cambo-</i><br><i>gia</i> Extract | <i>Garcinia indica</i><br>Formulation | <i>Garcinia in-</i><br><i>dica</i> Extract | Garcinol          |
| CYP1A2      | Tacrine          | α-naphthoflavone   | >30                                              | >30                                          | >30                                   | >30                                        | 7.6*              |
| CYP2B6      | Bupropion        | Ticlopidine        | >30 (48.3)*                                      | >30 (62.3) <sup>#</sup>                      | >30 (52.6) <sup>#</sup>               | >30 (75.5) <sup>#</sup>                    | 2.1*              |
| CYP2C8      | Paclitaxel       | Quercetin          | >30                                              | >30                                          | >30                                   | >30                                        | >30               |
| CYP2C9      | Diclofenac       | Sulphaphenazole    | >30                                              | >30                                          | >30                                   | >30                                        | 8.0*              |
| CYP2C19     | S-Mephenytoin    | N-Benzyl nirvanol  | >30                                              | >30                                          | >30                                   | >30                                        | 16.4 <sup>#</sup> |
| CYP2D6      | Dextromethorphan | Quinidine          | >30                                              | >30                                          | >30                                   | >30                                        | 9.5*              |
| CYP2E1      | Chlorzoxazone    | 4- Methyl Pyrazole | >30                                              | >30                                          | >30                                   | >30                                        | 19 <sup>#</sup>   |
| CYP3A4      | Midazolam        | Ketoconazole       | >30 (84.7) <sup>#</sup>                          | >30 (75.2) <sup>#</sup>                      | >30 (93.5) <sup>#</sup>               | >30 (89.2) <sup>#</sup>                    | 5.1*              |

\* Significant inhibition, # moderate inhibition; IC<sub>50</sub> values mentioned in brackets are below 100 μg/mL but more than 30 μg/mL which is considered to show inhibition for Formulation and extracts.

## Extraction

*Garcinia cambogia*, *Garcinia indica* extracts and formulations were accurately weighed and transferred to separate eppendorf tubes and dissolved in MQ Water to make 50 mg/mL stock solution. The tubes were first shaken vigorously and sonicated for 30 min and filtered using 0.45 μm syringe filter. These stock solutions were kept at -20 °C and used for further studies.

## CYP Inhibition study

The entire procedure is same as mentioned in section 2.3 except for various concentrations of the formulations and extracts (0.41-100 μg/mL) and garcinol (0.11-30 μM) were used in the study.

**Table S2.** GLIDE docking results for Garcinol at the active sites of different CYPs.

| S. no | CYPs                   | Ligand name          | Docking score | Binding energy (kcal/mol) | Interactions           |                 |               |                                                                                                        |
|-------|------------------------|----------------------|---------------|---------------------------|------------------------|-----------------|---------------|--------------------------------------------------------------------------------------------------------|
|       |                        |                      |               |                           | H- bonds               | $\pi$ - cat-ion | $\pi$ - $\pi$ | Hydrophobic                                                                                            |
| 1     | CYP1A2 (PDB ID: 2HI4)  | Garcinol             | -             | -                         | -                      | -               | -             | -                                                                                                      |
|       |                        | alpha-Naphthoflavone | -11.252       | -62.439                   | -                      | -               | Phe226        | Ile117, Phe125, Phe226, Val227, Phe256, Phe260, Ala317, Leu382, Ile386, Leu497                         |
| 2     | CYP2B6 (PDB ID: 5UFG)  | Garcinol             | -3.016        | -32.432                   | Lys100, Asn117, Asp385 | Lys100          | -             | Ile101, Pro106, Phe108, Tyr111, Phe115, Ala116, Ile370                                                 |
|       |                        | Ticlopidine          | -7.250        | -25.191                   | -                      | Phe297          | -             | Ile101, Val104, Phe108, Val114, Phe115, Phe206, Ile209, Phe297, Ala298, Leu362, Leu363, Val367, Val477 |
| 3     | CYP2C8 (PDB ID: 2VN0)  | Garcinol             | -             | -                         | -                      | -               | -             | -                                                                                                      |
|       |                        | Quercitin            | -6.950        | -26.853                   | Phe201, Asn202, Glu300 | -               | Phe205        | Ile113, Phe201, Phe205, Leu208, Val296, Ala297, Val362, Val366, Ile476, Val477                         |
| 4     | CYP2C9 (PDB ID: 4NZ2)  | Garcinol             | -             | -                         | -                      | -               | -             | -                                                                                                      |
|       |                        | Sulphaphenazole      | -6.139        | -8.326                    | -                      | -               | -             | Val113, Phe114, Ile205, Leu208, Val292, Ala297, Leu361, Leu362, Leu366, Pro367, Ala477, Val479         |
| 5     | CYP2C19 (PDB ID: 4GQS) | Garcinol             | -             | -                         | -                      | -               | -             | -                                                                                                      |
|       |                        | Benzyl nirvanol      | -6.072        | -1.294                    | -                      | -               | -             | Phe100, Leu102, Val113, Phe114, Leu201, Ile205, Val208, Leu233, Leu237, Ala297, Ile362, Leu366, Phe476 |
| 6     |                        | Garcinol             | -             | -                         | -                      | -               | -             | -                                                                                                      |

|   |                       |                  |        |         |                       |       |                |                                                                                                                                       |
|---|-----------------------|------------------|--------|---------|-----------------------|-------|----------------|---------------------------------------------------------------------------------------------------------------------------------------|
|   | CYP2D6 (PDB ID: 3QM4) | Quinidine        | -7.506 | -20.304 | Ser304                | -     | -              | Leu110, Phe120, Ala209, Leu213, Phe247, Ala305, Val308, Ile369, Val370, Phe483, Leu484                                                |
| 7 | CYP2E1 (PDB ID: 3GPH) | Garcinol         | -      | -       | -                     | -     | -              | -                                                                                                                                     |
|   |                       | 4-Methylpyrazole | -5.028 | -17.042 | -                     | -     | -              | Ile115, Phe207, Phe298, Ala299, Leu363, Val364, Leu368, Phe478                                                                        |
| 8 | CYP3A4 (PDB ID: 4K9W) | Garcinol         | -7.310 | -34.634 | Ile369, Arg372        | -     | -              | Phe57, Phe108, Met114, Ile120, Leu210, Leu211, Phe213, Phe241, Ile300, Ile301, Phe304, Ala305, Ile369, Ala370, Met371, Leu482, Leu483 |
|   |                       | Ketoconazole     | -8.236 | -49.138 | Asp76, Thr309, Met371 | Phe57 | Arg106, Phe213 | Ile50, Tyr53, Phe57, Phe108, Leu211, Phe213, Phe215, Phe304, Ala305, Ile369, Ala370, Met371, Leu482, Leu483                           |

Note: Garcinol was found to have no interaction against other CYP isoforms (CYP1A2, CYP2C8, CYP2C9, CYP2C19, CYP2D6, and CYP2E1) therefore the values were not mentioned.

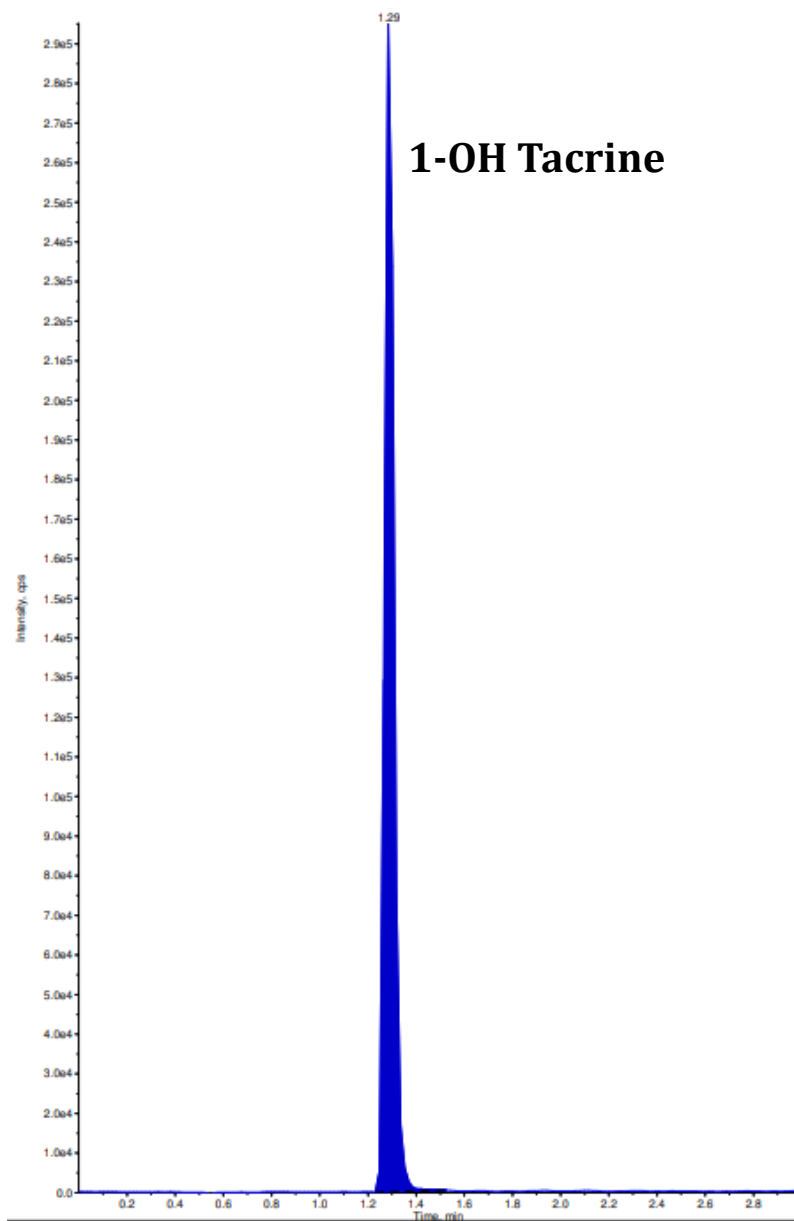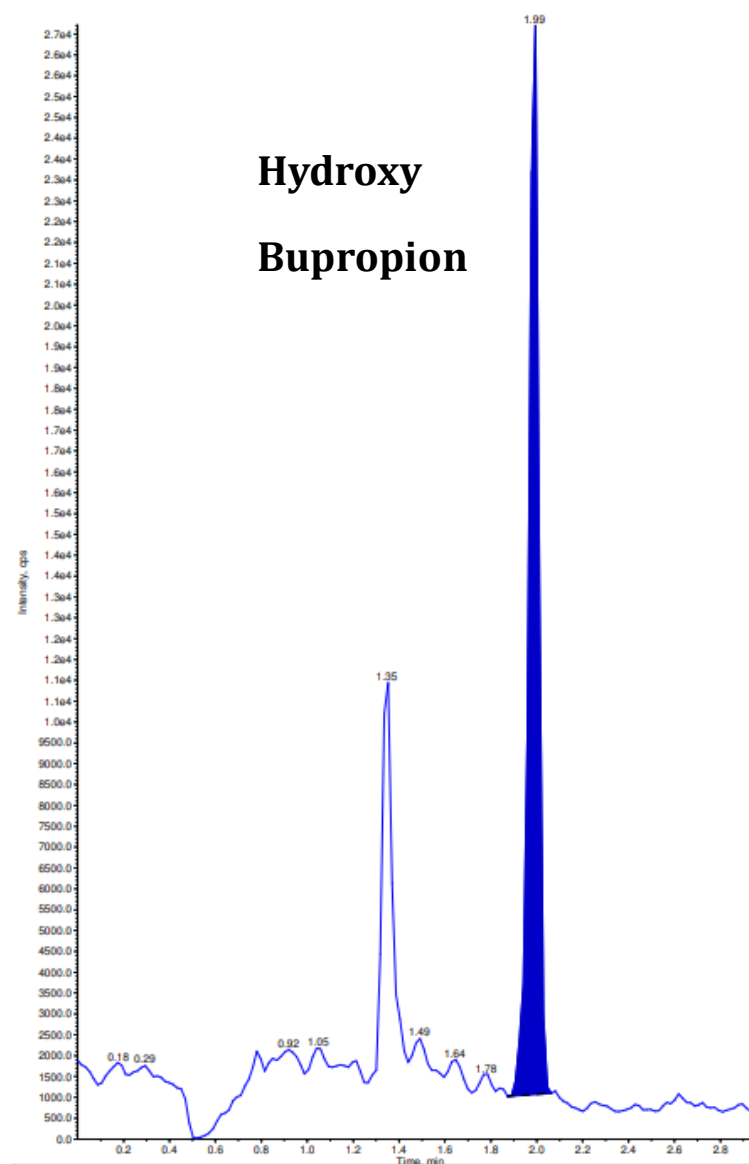

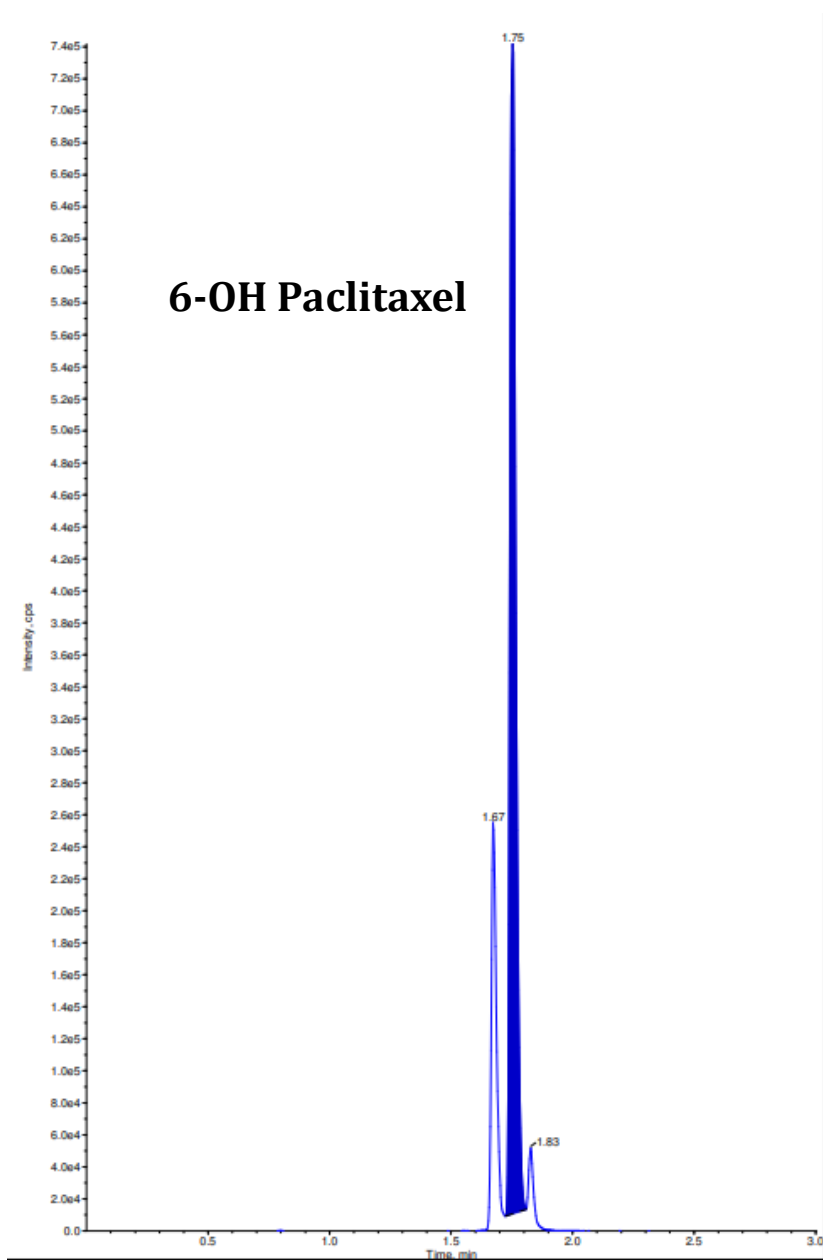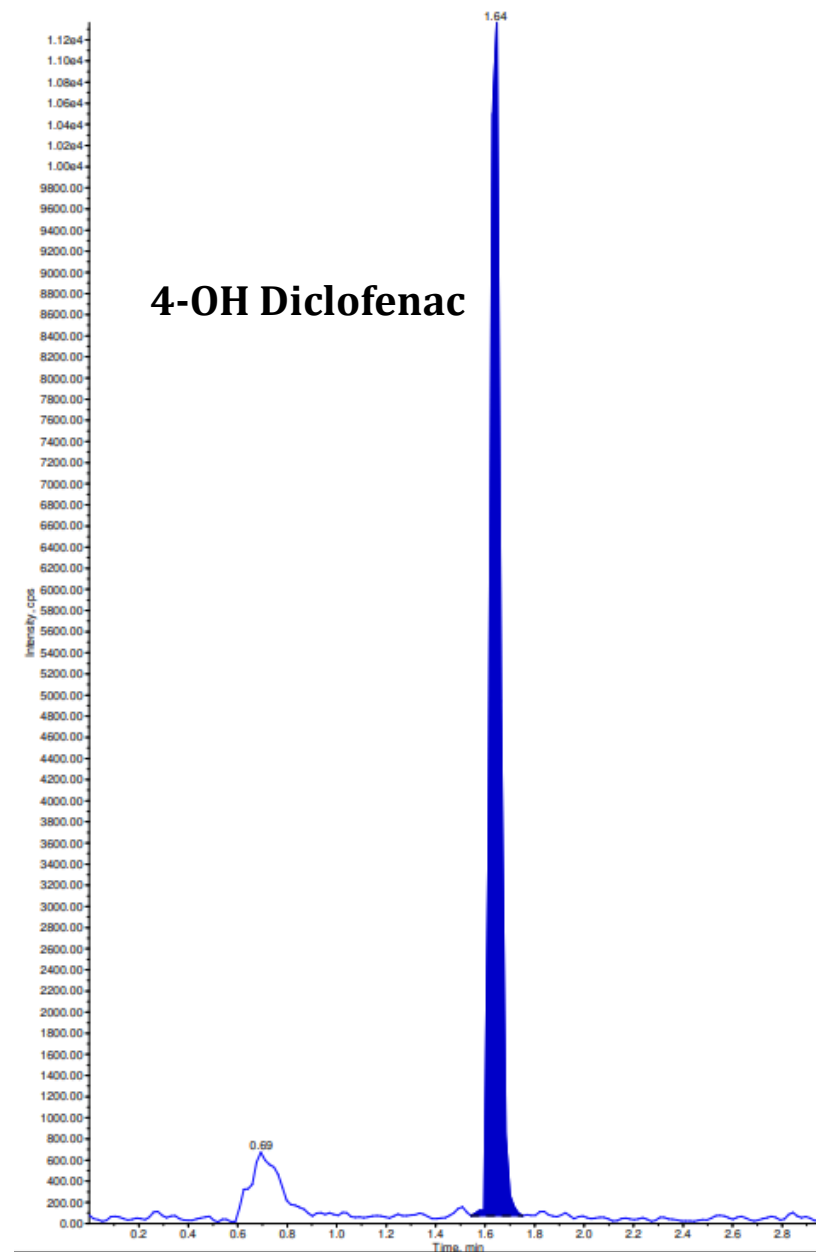

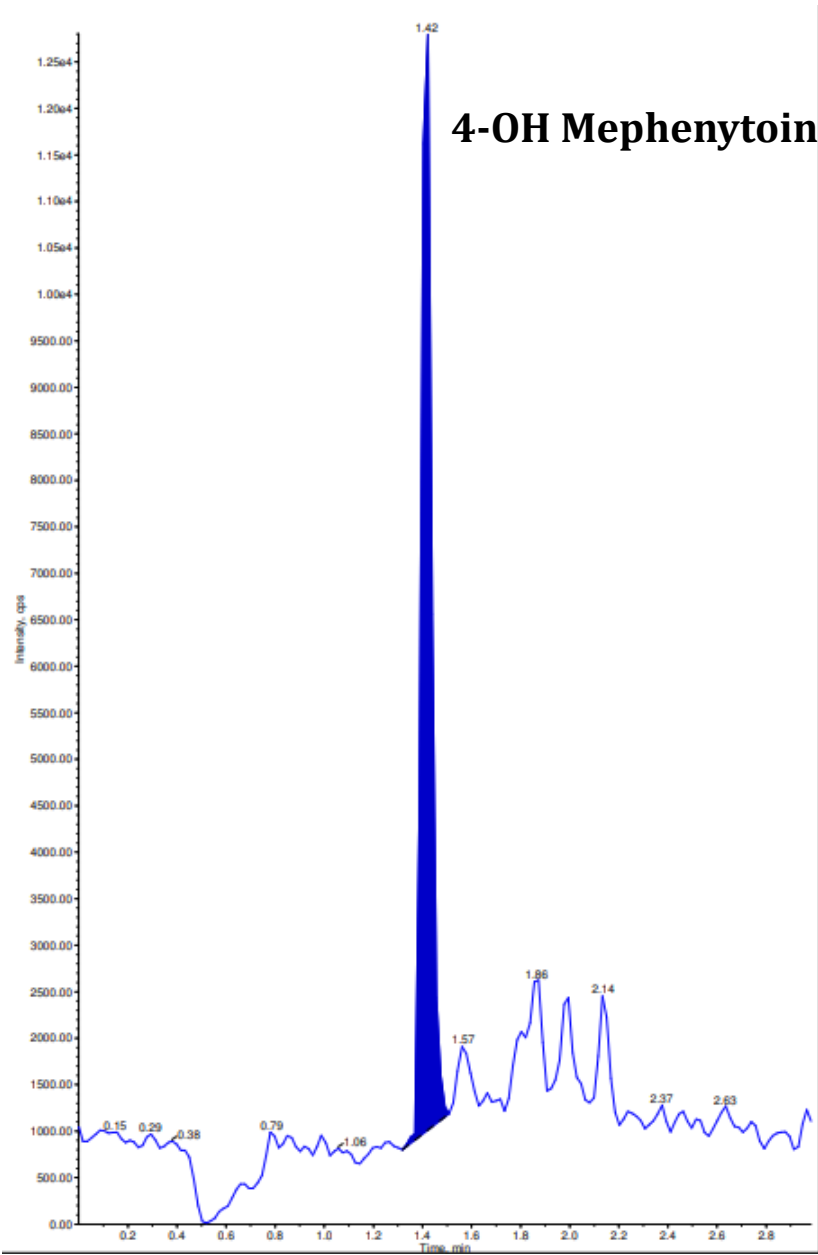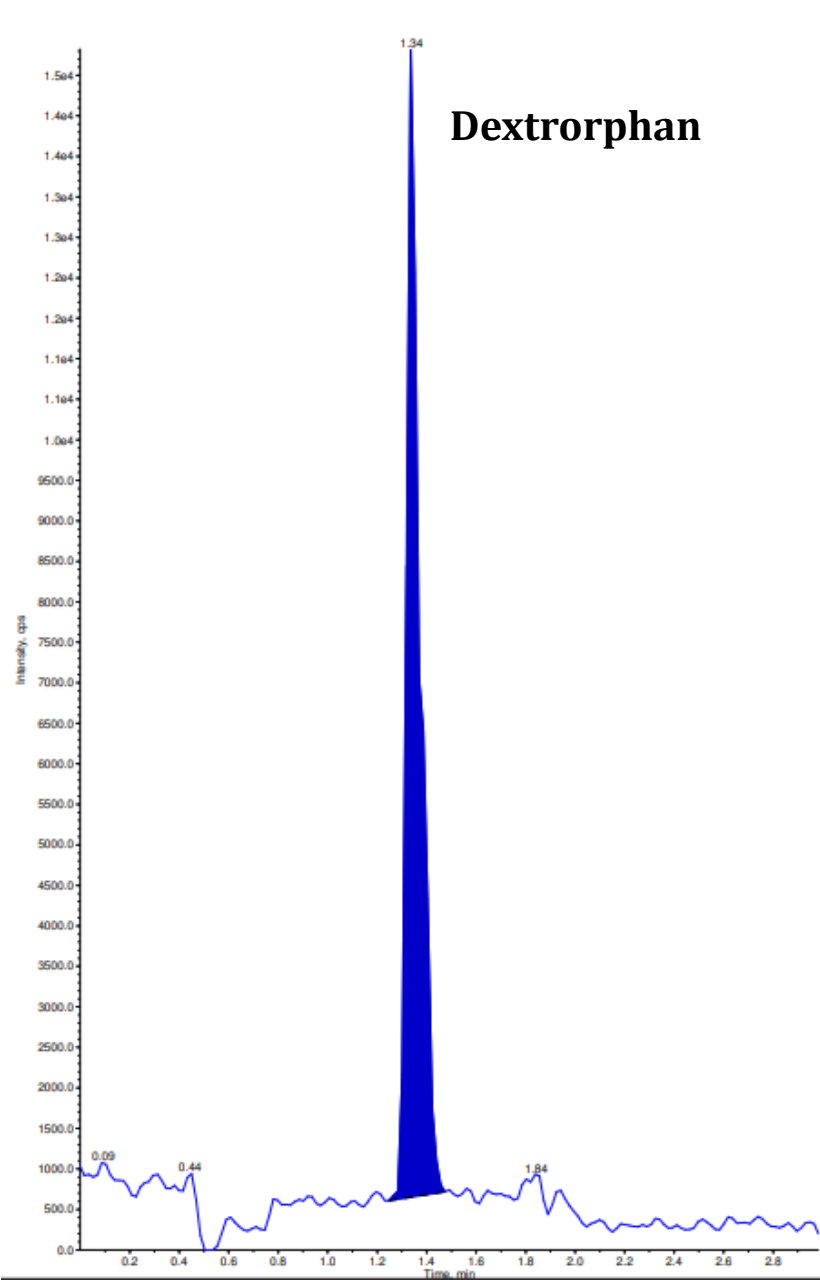

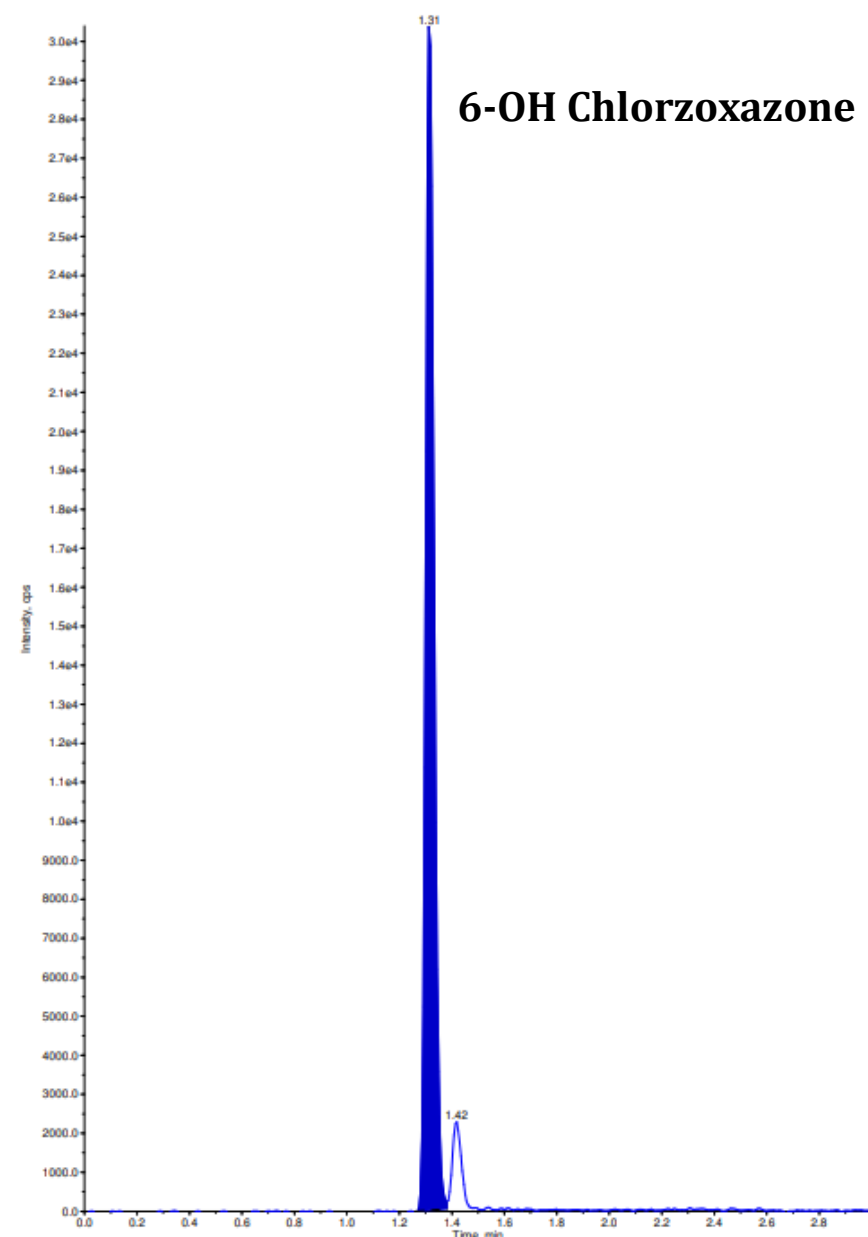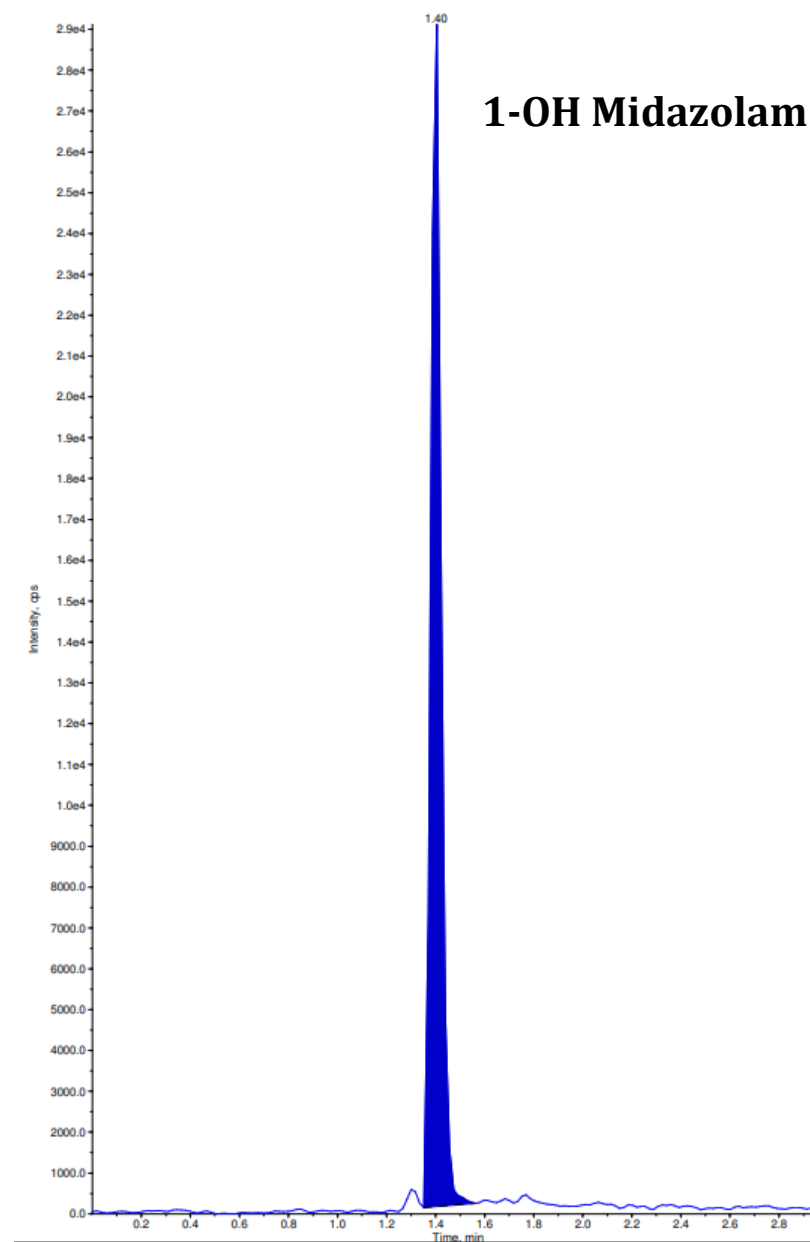

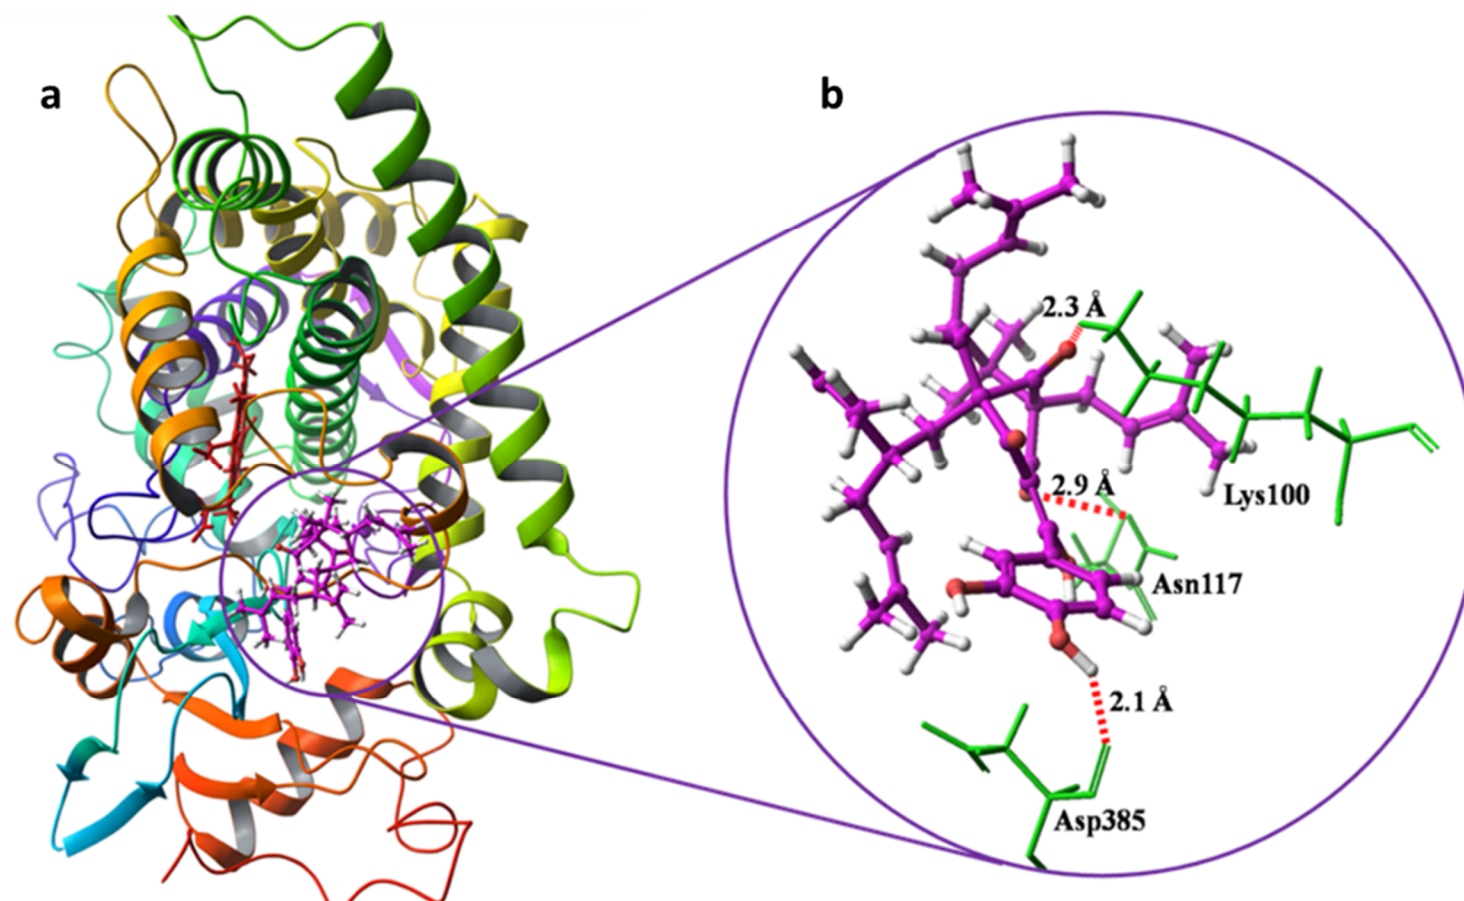

**Figure S1.** LC-MS/MS chromatograms of eight CYP-450 specific metabolites.



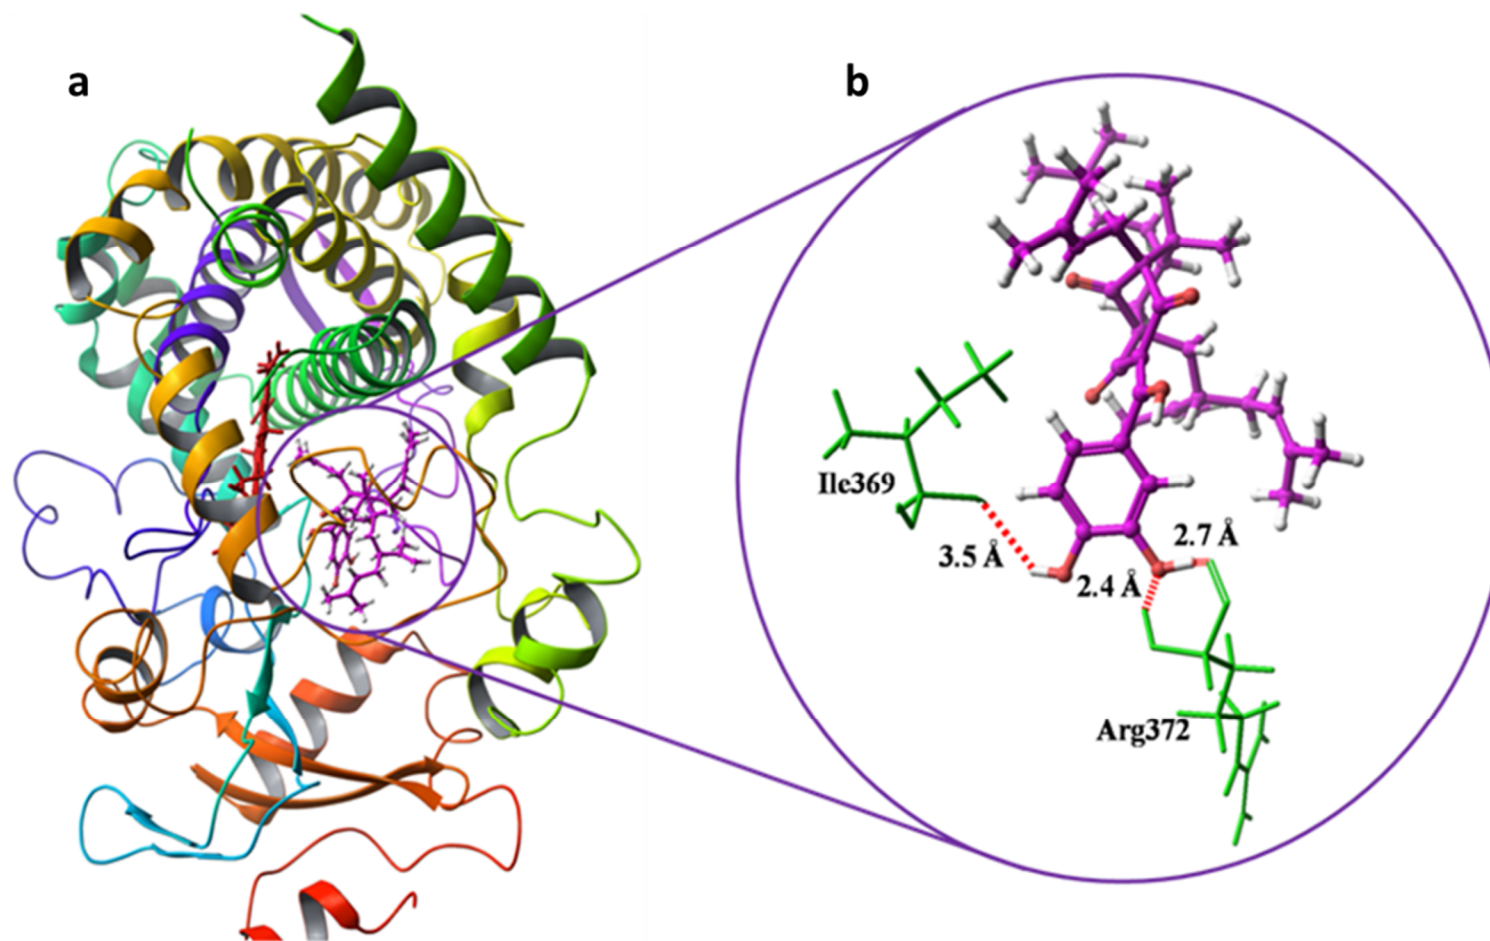

**Figure S2.** A. (a) Docking model of garcinol at the active site of CYP2B6 (PDB ID: 5UFG) and (b) its ligand-protein interactions in the binding site of CYP2B6 (Purple: Protein, 2B6; Green: Ligand, Garcinol; Red: Hydrogen bonds); B. (a) Docking model of garcinol at the active site of CYP3A4 (PDB ID: 4K9W) and (b) its ligand-protein interactions in the binding site of CYP3A4 (Purple: Protein, 2B6; Green: Ligand, Garcinol; Red: Hydrogen bonds).
